# Supplementary material for: Identification and Characterization of Three Chitinases with Potential in Direct Conversion of Crystalline Chitin into N,N′-diacetylchitobiose
Source: MDPI journal article supplement (doi:10.3390/md20030165), 2022-02-24
Supplement: s1 [file s1]

# Identification and characterization of three chitinases with potentials in direct conversion of crystalline chitin into *N,N'*-diacetylchitobiose

Xue-Bing Ren<sup>1</sup>, Yan-Ru Dang<sup>1</sup>, Sha-Sha Liu<sup>1</sup>, Ke-Xuan Huang<sup>1</sup>, Qi-Long Qin<sup>1,2</sup>;Xiu-Lan Chen<sup>1,3</sup>, Yu-Zhong Zhang<sup>1,2,3</sup>, Yan-Jun Wang<sup>1,4\*</sup>;Ping-Yi Li<sup>1\*</sup>

1. State Key Laboratory of Microbial Technology/Institute of Marine Science and Technology, Shandong University, Qingdao 266237, China

2. College of Marine Life Sciences, and Frontiers Science Center for Deep Ocean Multispheres and Earth System, Ocean University of China, Qingdao 266003, China

3. Laboratory for Marine Biology and Biotechnology, Pilot National Laboratory for Marine Science and Technology, Qingdao 266237, China

4. Institute of Wetland Agriculture and Ecology, Shandong Academy of Agricultural Sciences, Jinan 250100, China

\* Correspondence: Author to whom correspondence should be addressed: Ping-Yi Li, lipingyipeace@sdu.edu.cn; Yan-Jun Wang, wang.yanjun1985@163.com.

**Table S1** General information of 26 type strains of *Pseudoalteromonas*.

| Strain                                           | Isolation source | Region                                 | Reference |
|--------------------------------------------------|------------------|----------------------------------------|-----------|
| <i>P. agarivorans</i> DSM 14585 <sup>T</sup>     | Ascidians        | Pacific Ocean                          | 1         |
| <i>P. aliena</i> DSM 16473 <sup>T</sup>          | Seawater         | Sea of Japan                           | 2         |
| <i>P. arctica</i> DSM 18437 <sup>T</sup>         | Seawater         | Arctic                                 | 3         |
| <i>P. aurantia</i> DSM 6057 <sup>T</sup>         | Seawater         | Nice, France                           | 4         |
| <i>P. carrageenovora</i> DSM 6820 <sup>T</sup>   | Seaweed          | Japan                                  | 5         |
| <i>P. citrea</i> DSM 8771 <sup>T</sup>           | Seawater         | Mediterranean Sea near Nice            | 6         |
| <i>P. espejiana</i> DSM 9414 <sup>T</sup>        | Seawater         | the coast of Northern California, U.S. | 7         |
| <i>P. flavipulchra</i> DSM 14401 <sup>T</sup>    | Seawater         | Nice, France                           | 8         |
| <i>P. issachenkonii</i> DSM 15925 <sup>T</sup>   | Brown alga       | Pacific Ocean                          | 9         |
| <i>P. lipolytica</i> JCM 15903 <sup>T</sup>      | Seawater         | the Yangtze River estuary , China      | 10        |
| <i>P. luteoviolacea</i> DSM 6061 <sup>T</sup>    | Seawater         | Nice, France                           | 11        |
| <i>P. marina</i> DSM 17587 <sup>T</sup>          | Seawater         | East Sea in Korea                      | 12        |
| <i>P. mariniglutinosa</i> DSM 15203 <sup>T</sup> | Diatom           | Marseille Gulf                         | 13        |
| <i>P. nigrifaciens</i> DSM 8810 <sup>T</sup>     | Mussels          | Sea of Japan                           | 14        |
| <i>P. paragorgicola</i> DSM 26439 <sup>T</sup>   | Gorgonian        | Pacific Ocean                          | 15        |
| <i>P. peptidolytica</i> DSM 14001 <sup>T</sup>   | Seawater         | Sea of Japan                           | 16        |
| <i>P. phenolica</i> JCM 21460 <sup>T</sup>       | Seawater         | Ogasawara Island, Japan                | 17        |
| <i>P. piscicida</i> JCM 20779 <sup>T</sup>       | Red tide waters  | southwest coast of Florida, U.S.       | 18        |
| <i>P. prydzensis</i> DSM 14232 <sup>T</sup>      | Sea ice          | Antarctica                             | 19        |
| <i>P. rubra</i> DSM 6842 <sup>T</sup>            | Seawater         | Mediterranean, Nice, France            | 20        |
| <i>P. spongiae</i> JCM 12884 <sup>T</sup>        | Sponge           | Hong Kong waters, China                | 21        |
| <i>P. tetraodonis</i> DSM 9166 <sup>T</sup>      | Puffer fish      | Japan                                  | 22        |
| <i>P. translucida</i> DSM 14402 <sup>T</sup>     | Seawater         | Sea of Japan                           | 15        |
| <i>P. tunicata</i> DSM 14096 <sup>T</sup>        | Tunicate         | western coast of Sweden                | 23        |
| <i>P. ulvae</i> DSM 15557 <sup>T</sup>           | Marine alga      | Australia                              | 24        |
| <i>P. undina</i> DSM 6065 <sup>T</sup>           | Seawater         | the coast of Northern California, U.S. | 7         |



B

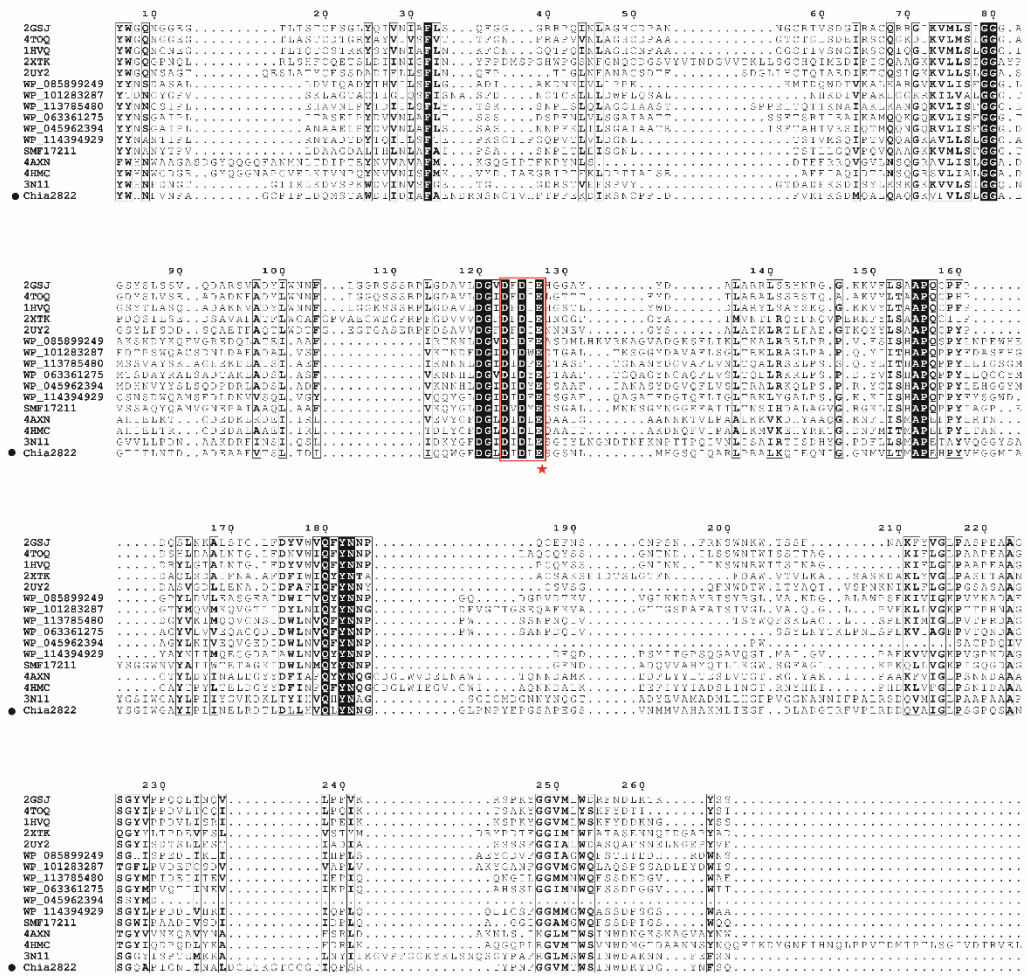

**Figure S1.** Multiple sequence alignments of Chib0431, Chib0434, Chia2827 and Chia2822 with known GH18 chitinases. The conserved catalytic motif (DxDxE) in GH18 chitinases is indicated by red boxes. (A) The alignments of Chib0431, Chib0434, Chia2827 with known GH18A subfamily chitinases. (B) The alignments of Chia2822 with known GH18B subfamily chitinases.

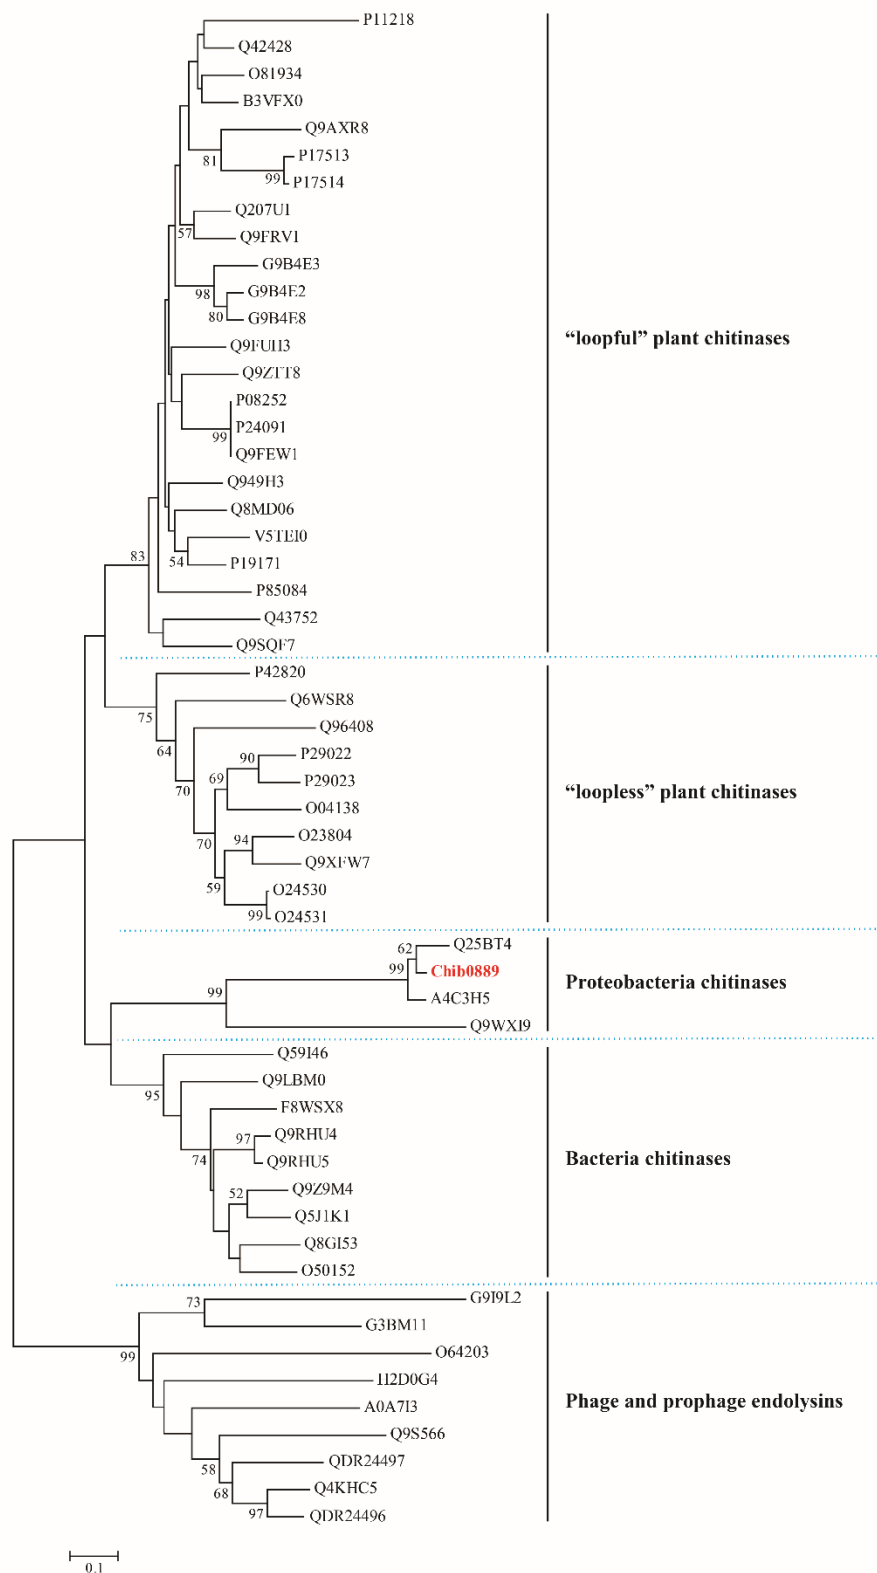

**Figure S2.** Phylogenetic analysis of Chib0889 with other GH19 chitinases. The phylogenetic tree was constructed by the Neighbor-Joining method. Bootstrap analysis of 1,000 replicates was conducted.

**Table S2** Purification of the recombinant enzymes Chib0431, Chib0434 and Chia4287.

| Enzyme   | Purification step       | Total volume (mL) | Protein concentration (mg/mL) | Enzyme activity (U/mL) <sup>a</sup> | Total activity (U) | Specific activity (U/mg) | Purification fold <sup>b</sup> | Yield (%) <sup>c</sup> |
|----------|-------------------------|-------------------|-------------------------------|-------------------------------------|--------------------|--------------------------|--------------------------------|------------------------|
| Chib0431 | Cell extract            | 137               | 3.21                          | 0.012                               | 1.64               | 0.004                    | 1                              | 100                    |
|          | Affinity chromatography | 3.5               | 3.25                          | 0.087                               | 0.30               | 0.027                    | 6.75                           | 18.29                  |
| Chib0434 | Cell extract            | 120               | 4.60                          | 0.015                               | 1.80               | 0.003                    | 1                              | 100                    |
|          | Affinity chromatography | 3.5               | 0.96                          | 0.015                               | 0.05               | 0.016                    | 5.33                           | 2.78                   |
| Chia4287 | Cell extract            | 90                | 9.05                          | 0.086                               | 7.74               | 0.010                    | 1                              | 100                    |
|          | Affinity chromatography | 3.5               | 12.67                         | 0.926                               | 3.24               | 0.073                    | 7.30                           | 41.86                  |

<sup>a</sup> Enzyme activity was measured with chitin powder as the substrate.

<sup>b</sup> (Ratio of the specific activity after purification to that of the cell extract.

<sup>c</sup> Percentage of total activity recovered after purification compared with that of the cell extract.

## Reference

1. Romanenko, L.A.; Zhukova, N.V.; Rohde, M.; Lysenko, A.M.; Mikhailov, V.V.; and Stackebrandt, E. *Pseudoalteromonas agarivorans* sp. nov., a novel marine agarolytic bacterium. *Int. J. Syst. Evol. Microbiol.* **2003**, *53*, 125-131.
2. Ivanova, E.P.; Gorshkova, N.M.; Zhukova, N.V.; Lysenko, A.M.; Zelepuga, E.A.; Prokof'eva, N.G.; Mikhailov, V.V.; Nicolau, D.V.; Christen, R. Characterization of *Pseudoalteromonas distincta*-like sea-water isolates and description of *Pseudoalteromonas aliena* sp. nov. *Int. J. Syst. Evol. Microbiol.* **2004**, *54*, 1431-1437.
3. Al Khudary, R.; Stosser, N.I.; Qoura, F.; Antranikian, G. *Pseudoalteromonas arctica* sp. nov., an aerobic, psychrotolerant, marine bacterium isolated from Spitzbergen. *Int. J. Syst. Evol. Microbiol.* **2008**, *58*, 2018-2024.
4. Gauthier, M.; and Breittmayer, V.A. A new antibiotic-producing bacterium from seawater: *Alteromonas aurantia* sp. nov. *Int. J. Syst. Evol. Microbiol.* **1979**, *29*, 366-372.
5. Akagawa-Matsushita, M.; Matsuo, M.; Koga, Y.; Yamasato, K. *Alteromonas atlantica* sp. nov. and *Alteromonas carrageenovora* sp. nov., bacteria that decompose algal polysaccharides. *Int. J. Syst. Evol. Microbiol.* **1993**, *42*, 621-627.
6. Gauthier, M. *Alteromonas citrea*, a new Gram-negative, yellow-pigmented species from seawater. *Int. J. Syst. Evol. Microbiol.* **1977**, *27*, 349-354.
7. Chan, K.; Baumann, L.; Garza, M.; Baumann, P. Two new species of *Alteromonas*: *Alteromonas espejiana* and *Alteromonas undina*. *Int. J. Syst. Evol. Microbiol.* **1978**, *28*, 217-222.
8. Ivanova, E.P.; Shevchenko, L.S.; Sawabe, T.; Lysenko, A.M.; Svetashev, V.I.; Gorshkova, N.M.; et al. (). *Pseudoalteromonas maricaloris* sp. nov., isolated from an Australian sponge, and reclassification of [*Pseudoalteromonas aurantia*] NCIMB 2033 as *Pseudoalteromonas flavipulchra* sp. nov. *Int. J. Syst. Evol. Microbiol.* **2002**, *52*, 263-271.
9. Ivanova, E.P.; Sawabe, T.; Alexeeva, Y.V.; Lysenko, A.M.; Gorshkova, N.M.; Hayashi, K.; Zhukova, N.V.; Christen, R.; Mikhailov, V.V. *Pseudoalteromonas issachenkonii* sp. nov., a bacterium that degrades the thallus of the brown alga *Fucus evanescens*. *Int. J. Syst. Evol. Microbiol.* **2002**, *52*, 229-234.
10. Xu, X.W.; Wu, Y.H.; Wang, C.S.; Gao, X.H.; Wang, X.G.; Wu, M. *Pseudoalteromonas lipolytica* sp. nov., isolated from the Yangtze River estuary. *Int. J. Syst. Evol. Microbiol.* **2009**, *60*, 2176-2181.
11. Gauthier, M. Validation of the name *Alteromonas luteoviolacea*. *Int. J. Syst. Evol. Microbiol.* **1982**, *32*(1), 82-86.
12. Yoon, J.H.; Kim, I.G.; Kang, K.H.; Oh, T.K.; Park, Y.H. *Alteromonas marina* sp. nov., isolated from sea water of the East Sea in Korea. *Int. J. Syst. Evol. Microbiol.* **2003**, *53*, 1625-1630.
13. Romanenko, L.A.; Zhukova, N.V.; Lysenko, A.M.; Mikhailov, V.V.; Stackebrandt, E. Assignment of '*Alteromonas marinoglutinosa*' NCIMB 1770 to *Pseudoalteromonas mariniglutinosa* sp. nov., nom. rev., comb. nov. *Int. J. Syst. Evol. Microbiol.* **2003**, *53*, 1105-1109.
14. Ivanova, E.P.; Kiprianova, E.A.; Mikhailov, V.V.; Levanova, G.F.; Garagulya, A.D.; Gorshkova, N.M.; Yumoto, N. Characterization and identification of marine *Alteromonas nigrifaciens* strains and emendation of the description. *Int. J. Syst. Evol. Microbiol.* **1996**, *46*, 223-228.
15. Ivanova, E.P.; Sawabe, T.; Lysenko, A.M.; Gorshkova, N.M.; Hayashi, K.; Zhukova, N.V.; Nicolau, D.V.; Christen, R.; Mikhailov, V.V. *Pseudoalteromonas translucida* sp. nov. and *Pseudoalteromonas paragorgicola* sp. nov., and emended description of the genus. *Int. J. Syst. Evol. Microbiol.* **2002**, *52*, 1759-1766.
16. Venkateswaran, K.; Dohmoto, N. *Pseudoalteromonas peptidolytica* sp. nov., a novel marine mussel-thread-degrading bacterium isolated from the Sea of Japan. *Int. J. Syst. Evol. Microbiol.* **2000**, *50*, 565-574.
17. Isnansetyo, A.; Kamei, Y. *Pseudoalteromonas phenolica* sp. nov., a novel marine bacterium that produces phenolic anti-methicillin-resistant *Staphylococcus aureus* substances. *Int. J. Syst. Evol. Microbiol.* **2003**, *53*, 583-588.
18. Hansen, A.; Weeks, O.; and Colwell, R. Taxonomy of *Pseudomonas piscicida* (Bein) Buck, Meyers, and Leifson. *J. Bacteriol.* **1965**, *89*, 752-761.

19. Bowman, J.P. *Pseudoalteromonas prydzensis* sp. nov., a psychrotrophic, halotolerant bacterium from Antarctic sea ice. *Int. J. Syst. Evol. Microbiol.* **1998**, 48, 1037-1041.
20. Gauthier, M. *Alteromonas rubra* sp. nov., a new marine antibiotic-producing bacterium. *Int. J. Syst. Evol. Microbiol.* **1976**, 26, 459-466.
21. Lau, S.C.; Tsoi, M.M.; Li, X.; Dobretsov, S.; Plakhotnikova, Y.; Wong, P.-K.; Qian, P.Y. *Pseudoalteromonas spongiae* sp. nov., a novel member of the  $\gamma$ -Proteobacteria isolated from the sponge *Mycale adhaerens* in Hong Kong waters. *Int. J. Syst. Evol. Microbiol.* **2005**, 55, 1593-1596.
22. Ivanova, E.P.; Romanenko, L.A.; Matte, M.H.; Matte, G.R.; Lysenko, A.M.; Simidu, U.; Kita-Tsukamoto, K.; Sawabe, T.; Vysotskii, M.V.; Frolova, G.M.; Mikhailov, V.; Christen, R.; Colwell, R.R. Retrieval of the species *Alteromonas tetraodonis* Simidu et al. 1990 as *Pseudoalteromonas tetraodonis* comb. nov. and emendation of description. *Int. J. Syst. Evol. Microbiol.* **2001**, 51, 1071-1078.
23. Holmström, C.; James, S.; Neilan, B.A.; White, D.C.; Kjelleberg, S. *Pseudoalteromonas tunicata* sp. nov., a bacterium that produces antifouling agents. *Int. J. Syst. Evol. Microbiol.* **1998**, 48, 1205-1212.
24. Egan, S.; Holmström, C.; Kjelleberg, S. *Pseudoalteromonas ulvae* sp. nov., a bacterium with antifouling activities isolated from the surface of a marine alga. *Int. J. Syst. Evol. Microbiol.* **2001**, 51, 1499-1504.
